# Supplementary material for: Candidate chemosensory genes identified from the greater wax moth, Galleria mellonella, through a transcriptomic analysis
Source: PubMed Central journal article supplement (PMC6624281; doi:10.1038/s41598-019-46532-x), 2019-07-11
Supplement: 41598_2019_46532_MOESM1_ESM.pdf [file 41598_2019_46532_MOESM1_ESM.pdf]

1  
2  
3  
4  
5  
6  
7  
8  
9  
10  
11  
12  
13  
14  
15  
16  
17  
18  
19  
20  
21  
22

## Supplementary Information for

### Candidate chemosensory genes identified from the greater wax moth, *Galleria mellonella*, through a transcriptomic analysis

Hong-Xia Zhao<sup>1</sup>, Wan-Yu Xiao<sup>2</sup>, Cong-Hui Ji<sup>1</sup>, Qin Ren<sup>3</sup>, Xiao-Shan Xia<sup>1</sup>, Xue-Feng Zhang<sup>1\*</sup>, Wen-Zhong Huang<sup>1\*</sup>

<sup>1</sup>Guangdong Key Laboratory of Animal Conservation and Resource Utilization,  
Guangdong Public Laboratory of Wild Animal Conservation and Utilization,  
Guangdong Institute of Applied Biological Resources, Guangzhou 510260, PR China

<sup>2</sup>Guangzhou Academy of Agricultural Sciences, Guangzhou 510308, PR China

<sup>3</sup>Chongqing Academy of Animal Science, Chongqing 402460, PR China

\*Corresponding author

Email addresses:

**Hong-Xia Zhao:** hxzh110@126.com

**Wan-Yu Xiao:** yuwanxiao22@126.com

**Cong-Hui Ji:** 94660538@qq.com

**Qin Ren:** 53665069@qq.com

**Xiao-Shan Xia:** 244090974@qq.com

**Xue-Feng Zhang:** zxf3802@126.com

**Wen-Zhong Huang:** gggbmm@163.com

**Table S1.** Overview of the sequencing and assembly process.

|                                                                          | MA (male)     | FA (female)   |
|--------------------------------------------------------------------------|---------------|---------------|
| Mean length (bp)                                                         | 150           | 150           |
| Total Raw Reads                                                          | 37,238,352    | 41,665,706    |
| Total Raw Bases                                                          | 5,585,752,800 | 6,249,855,900 |
| Total Clean Reads                                                        | 36,840,810    | 41,460,680    |
| Total Clean Reads Ratio (%)                                              | 98.93         | 99.51         |
| Total Clean Bases                                                        | 5,526,121,500 | 6,219,102,000 |
| Total Clean Bases Ratio (%)                                              | 98.93         | 99.51         |
| Total Adapter Reads                                                      | 381,922       | 203,664       |
| Total Adapter Reads Ratio (%)                                            | 1.03          | 0.49          |
| Total Low Quality Reads                                                  | 1,562         | 1,362         |
| Total Low Quality Reads Ratio (%)                                        | 0.04          | 0             |
| Clean Reads GC (%)                                                       | 42.2          | 43.42         |
| Clean Reads Q20 (%)                                                      | 93.15         | 96.1          |
| Clean Reads Q30 (%)                                                      | 84.65         | 90.78         |
| Combined Trinity assembly of the male and female antennal transcriptomes |               |               |
|                                                                          | Unigenes      | Transcripts   |
| Total Number                                                             | 54,234        | 65,593        |
| Min Length (bp)                                                          | 200           | 200           |
| Max length (bp)                                                          | 29,406        | 29,406        |
| Mean Length (bp)                                                         | 1,125         | 1,388         |
| Unigene N50                                                              | 2,131         | 2,511         |
| Unigene N90                                                              | 418           | 492           |

**Table S2.** Primers used in qPCR.

| Gene Name         | Forward Primer (5'-3') | Reverse Primer (5'-3')  | TM (°C) | Product size (bp) |
|-------------------|------------------------|-------------------------|---------|-------------------|
| Reference genes   |                        |                         |         |                   |
| Gmel $\beta$ -ACT | GGACTTGTACGCCAACACAG   | CCACATCTGCTGGAATGTCG    | 59      | 196               |
| GmelRL31          | TGCACAAACGCTTTCATGGT   | GGGTGAACAGTTTATGGGCA    | 59      | 228               |
| ORs               |                        |                         |         |                   |
| GmelOrco          | GCTCACTGCGAACACAATCA   | CAGCAGCCTCCTCATTTTCG    | 59      | 190               |
| GmelOR1           | CGGCTTGCAGTTCCAGTAT    | AAAGAGCCATCCAGTCCACA    | 59      | 210               |
| GmelOR2           | CAGAACTTCTTCGAGCCCTG   | ACTTCGATTTTCCCACGGTG    | 59      | 231               |
| GmelOR3           | GTGGGCATCATTGTCGGTTT   | CGATCCACCGGCATACAAAG    | 59      | 237               |
| GmelOR4           | CGCAACTTCTCTCCAGCATG   | GGCGACATCTGTTCCCATTT    | 59      | 220               |
| GmelOR5           | GCAGCTAAAGTCCTGATGATGT | CCAAAGTTGCCAAAATCGC     | 59      | 173               |
| GmelOR6           | ACCGTCATTAGCAAAGCGTT   | CAAAGGAACGGCAGTACACC    | 59      | 158               |
| GmelOR7           | AGACAACGTGGGAAGGCTAT   | CAATCTGCCTGTGGTGACC     | 59      | 210               |
| GmelOR8           | GTCGCTGATAGTTTGGAGCA   | AAGTACCATGTCAGTGCGGA    | 59      | 198               |
| GmelOR9           | TGTGTGCAGATGTGGAGAGT   | CCATCCGCAGTTGTACAGTG    | 59      | 236               |
| GmelOR10          | GACGTTATCAGCGGACCCTA   | GGTACATAGAAGAGCACCGC    | 59      | 194               |
| GmelOR11          | TGAGGACGGTGAAGAAACGA   | AGGTGCAGGACGTATGTTGA    | 59      | 208               |
| GmelOR12          | GCAGTTTCCTTGTTGTTTCGC  | CTGGTTTCTGAGCCTGCATC    | 59      | 178               |
| GmelOR13          | CAGACTGACGACATCTCCGA   | TCAATCATAGGTTGTACTCCCGT | 59      | 158               |
| GmelOR14          | TGCCTTCTCTGTGGTGAAC    | GACACGCTAACACTCTCCCT    | 59      | 192               |
| GmelOR15          | TGGTAGTAGAGGCTTGGCTG   | GCTCATCATCATTCCCTGGC    | 59      | 219               |
| GmelOR16          | TGACCAGTGCTGCTTTTCTG   | GCCCCATCCTATTACCGTCA    | 59      | 230               |
| GmelOR17          | GGCTTCGTGTTCCAGTTTGT   | CGTCTCCTTTTGCATCGTGT    | 59      | 160               |
| GmelOR18          | GCGTCACAGCCTATCAGATT   | AACACTCTCATAACGGACCCC   | 59      | 164               |
| GmelOR19          | TACGCCAGCCAGTTTAAACG   | GACACCATCGCAATGCCTAG    | 59      | 180               |
| GmelOR20          | GTTGCTGATGAAGAAGGGCC   | GAACCACATGTCGAATGCCA    | 59      | 210               |
| GmelOR21          | TTGCCTGATTCAGCTGCTTC   | AACTTGCACGTAGAATCGCG    | 59      | 227               |
| GmelOR22          | TACTTTGCCCTCGCCCTTAT   | TCGTCAAGTCCCCTGATCAT    | 59      | 191               |
| GmelOR23          | TTTGCCAGACACGGGTTTAC   | TGATTTTGCCAGAACACGCA    | 59      | 195               |
| GmelOR24          | GCAGCGGCCAATATAAACGT   | GCACAGGCCGAACATGATTGA   | 59      | 221               |
| GmelOR25          | GGTTTGCTTGTGTGTGTTGC   | TGATCAAGTTCACCGCAGAG    | 59      | 246               |

|              |                         |                         |    |     |
|--------------|-------------------------|-------------------------|----|-----|
| GmelOR26     | CGCACCCATTCTCGTAGTA     | ACAGATAACGCCACGCTAGT    | 59 | 184 |
| GmelOR27     | CATTGTTGCCAGTACTCCCG    | ATTCCGGGCAGAAAACACAC    | 59 | 199 |
| GmelOR28     | CGTTGATCCTAGCACCGTTG    | TCGCTACAATACCACCTCCA    | 59 | 192 |
| GmelOR29     | CACACTTGCCACCTTGCTTA    | TCAGTGCTCACCATAACCCA    | 59 | 249 |
| GmelOR30     | CGTAGCTTATGACTGCCTGC    | CTATCCCACACCTTCACCCG    | 59 | 250 |
| GmelOR31     | GGTTACTTAGCCACAGTCGC    | GCGTTCATCATTTTCACCGG    | 59 | 192 |
| GmelOR32     | TGCAGGATATAATAGCGAGTGGA | CCATCTTGCCGGTCTTGAAC    | 59 | 201 |
| GmelOR33     | TTACTAAGGAGAGGTGGCCG    | GCTCGATAAGTTCCTGATGCC   | 59 | 228 |
| GmelOR34     | GTTACCTACTACCCGACGCA    | AACTTCTCCGTTGCTTGCTG    | 59 | 242 |
| GmelOR35     | CGCGTTTCAACTAGTCTCGG    | CAAGGACTGAAGTATGCCGC    | 59 | 162 |
| GmelOR36     | TCTGACCAGGACGCTGAAAT    | TGTGCTGTGTTTGTGACGA     | 59 | 179 |
| GmelOR37     | ATGAGATCGTTGGTCCGCAA    | ACCAGGAACCAAGTCGAAAA    | 59 | 208 |
| GmelOR38     | AAACATCCGGCTAAAACATTT   | ACAGACAGGCTTTAAATATGCGT | 59 | 159 |
| GmelOR39     | CGATGGCTATGTACCTGGGT    | GAGGATTCAGCACCGCAAT     | 59 | 247 |
| GmelOR40     | AACTGCTTGCACCATGTTC     | TAAGAACCTGCGCGAAACAC    | 59 | 159 |
| GmelOR41     | GTGGTTCAATTCACGTCGAGT   | TCACTTTTCCACCAATCACTTGT | 59 | 173 |
| GmelOR42     | ACACCAAAGAAGATCGAAATGCT | TCGCGTTAATTTTCCAGCCC    | 59 | 220 |
| GmelOR43     | CGATTCCGTTGTTTGCTGAGA   | GCTCGCCTTAAGAACAGAAGT   | 59 | 233 |
| GmelOR44     | ATTCACCCACCCCTACCTG     | CCTGTGCTAATCACTTGCCA    | 59 | 235 |
| GmelOR45     | GCGGCTCAACAGTTCATCAA    | TGGGCCACATTTCTCTCAGT    | 59 | 187 |
| Antennal IRs |                         |                         |    |     |
| GmelIR8a     | TATTGGAATGACACAGCGCG    | TCTTGTTTTCCGCCGGTTTT    | 59 | 214 |
| GmelIR25a    | AGAGACGATGATGCCCCAAA    | ATTTTCCCTCTCCGCCATCA    | 59 | 222 |
| GmelIR76b    | ATCAGGAGGCATGGTAAGCA    | TAGAGGAATGCTGACGGTGT    | 59 | 242 |
| GmelIR1      | AACGGGGATTTTCTGCGTTC    | CCTGCAACCAAGATCTCGTG    | 59 | 164 |
| GmelIR21a    | GATCGTGGTGGTTGGGAAAC    | GCCAAACGGTGCAAAACATT    | 59 | 249 |
| GmelIR40a    | GGCCATCATCAGACCGTTTC    | GAGTCGTCGTGAACCAACAG    | 59 | 167 |
| GmelIR41a    | CCCCAGGATTCTAGCCAGTT    | GCCATGTTGAACCAGCAGAG    | 59 | 194 |
| GmelIR68a    | ACTGTACCCTTTCCCAACCC    | ATCGTCACCACTACAGAGGG    | 59 | 176 |
| GmelIR75d    | CCTCAGCATCGTCGAAGGTA    | TTTCTGATTGGCACGCTGAC    | 59 | 171 |
| GmelIR75p.1  | CAATGACTGACCGCTTCGAG    | TTCCTGACCTCCCATTTGCT    | 59 | 205 |
| GmelIR75p.2  | GAAGGATGCCAGGTGCGAGTA   | GCAGGACTTAGCACGAATCG    | 59 | 196 |
| GmelIR75q.1  | TGGACATCGTTATCTGGGCT    | TAGCTTTTGTGCGAGTGTGCG   | 59 | 175 |
| GmelIR75q.2  | TCTGCAAACATTGTCGCACT    | TGACACCTTCTTCCATGCTCA   | 59 | 217 |

|               |                        |                        |    |     |
|---------------|------------------------|------------------------|----|-----|
| GmelIR93a     | GCAGTCTCCGGCTATAGAGG   | TTTCGCCACCACTGACAATG   | 59 | 174 |
| Divergent IRs |                        |                        |    |     |
| GmelIR7d      | CGGTTGGGGATCACTACGTA   | AAGAACGGCCACTTGAGTTG   | 59 | 241 |
| GmelIR60a     | GTGTTGACAGTGACCGCTTA   | ACATCGATCAATGCTTGGGT   | 59 | 224 |
| GmelIR87a     | GTGTGTTCCCTAAAGCTGGCC  | TACCGCTTCTTGGCTCGAAT   | 59 | 230 |
| OBPs          |                        |                        |    |     |
| GmelPBP1      | CCTCTCCGCAAAACTGAACC   | AGAATCATGTCAGGTGCCCA   | 59 | 237 |
| GmelPBP2      | TACAGAAGATCGGATGCACC   | AGAAGTTCCTCCATCGACGG   | 59 | 216 |
| GmelPBP3      | GCAATTAGCGTGAGGGATGT   | CACTCGTGCCACCAAGTTT    | 59 | 224 |
| GmelGOBP1     | GTGCTTGTGATCAGTCTGCC   | AGTCGGTGAGGAGGTTGAAG   | 59 | 226 |
| GmelGOBP2     | AGTTCATCGGGAGTTGGGTT   | GCAGCGGACTTCATTACACG   | 59 | 219 |
| GmelOBP1      | GTGTTGGCTTTGGAGGGAAA   | GGTCAATTCTCTACCACGC    | 59 | 192 |
| GmelOBP2      | ATGCCCCACCCTAAACTCAA   | TGCCAACATACTTGCGTGAG   | 59 | 206 |
| GmelOBP3      | AAAGCAGCCAAAGAATCCGG   | ACCGTCTGTCACTTCTTCGT   | 59 | 219 |
| GmelOBP4      | CGGAGTAGCGAAACTGAACTG  | TCCTGCGAAAATTACTGCCG   | 59 | 219 |
| GmelOBP5      | TGGGATGACACGACAACAAC   | CATCCTTCATCTCTGCGGGA   | 59 | 245 |
| GmelOBP6      | GGTTCACGCTTGAATTTTCG   | GCACATAACGTCTCTGTCTTCG | 59 | 167 |
| GmelOBP7      | ATGCTTTGAACTGTCGCTCC   | TTCCATTCTGTCACGGTCA    | 59 | 210 |
| GmelOBP8      | AAGCGATCAAAGAATCCGGC   | GATCTAATGCACGCTGGGTC   | 59 | 238 |
| GmelOBP9      | GGAAACAGTGCCAACCCAAA   | GACTTTCCTGCAAGCAACGA   | 59 | 236 |
| GmelOBP10     | GATCACGAGAAGTTAGCGGC   | TCCGTCTGATTCGTCCCAA    | 59 | 201 |
| GmelOBP11     | AAATACGAACAACCAGCGCC   | TTCACCTCCACTCCCTGTTC   | 59 | 181 |
| GmelOBP12     | TGTAATGGTTATCGGGCTTGC  | ACGTCCATTCTTTTGCCATA   | 59 | 232 |
| GmelOBP13     | CCATCGACGAGTTGAAGCAG   | TTCCAGCCTCGTCCATCATT   | 59 | 177 |
| GmelOBP14     | TGGTATTGTAGATGGCGAAGGA | CGTACCCTGCGAATAAACT    | 59 | 172 |
| GmelOBP15     | GGGGATACTTCATGGCCGTA   | CCAGAGTTGCCGCAGTATTC   | 59 | 166 |
| GmelOBP16     | TTGAGAACCCGGAAGCTACC   | TCTTCTGCACCTCTTCCTCG   | 59 | 160 |
| GmelOBP17     | TACGACCGTCTGTGTGTTCA   | CGGTCTTGGGTCTGAAGAT    | 59 | 190 |
| CSP           |                        |                        |    |     |
| GmelCSP1      | AAGAGGCTATTGAGACCGGC   | GTTCGCCTTTGCCCTATCTT   | 59 | 173 |
| GmelCSP2      | CCCAAAACGAGCAGTACACC   | CGTTGTTGATGAGGTGACCG   | 59 | 234 |
| GmelCSP3      | TATCTGTCGTGGTAGTGGCG   | TCTGGAGTGCAICGACCTTT   | 59 | 154 |
| GmelCSP4      | CCGGTATGATGATTCGACGTA  | TCCACATGATGTTTCTAAGGCT | 59 | 151 |
| GmelCSP5      | CTTTGTGGTTCGAGTTGTGG   | TTGCGTTGCTTTTCCGTACA   | 59 | 219 |

|           |                        |                         |    |     |
|-----------|------------------------|-------------------------|----|-----|
| GmelCSP6  | TGATGGTGTAATTTGGACGAGA | GTCGGTGATCAATGATGTATCCC | 59 | 209 |
| GmelCSP7  | CACAAGACACGTACAACCCG   | TGCCGCATGTAGTTTGTAGC    | 59 | 171 |
| GmelCSP8  | GGAAACTGGACGATGCACTG   | TTGGTTAACATCTGCTGCCA    | 59 | 168 |
| GmelCSP9  | TCATTCTCGCCATTGTCGTG   | TTTTGTTCTGGTGTGCAAGAG   | 59 | 190 |
| GmelCSP10 | GATGAGTTTAGCAGCCGTGG   | CCTCCTTGATGTGCAGCTTT    | 59 | 182 |
| GmelCSP11 | GTGTTTACTTGGAGCCGCAA   | TGCTTACCCATCTTCTTTTGCT  | 59 | 228 |
| GmelCSP12 | CACAAACTGCAATGACGTTAGC | CCCTCTGGATCGAACTTCTTTC  | 59 | 177 |
| GmelCSP13 | AAGACTGCCACACTCAAACG   | GCTGATTCTAAAGCGTCGAAC   | 59 | 188 |
| GmelCSP14 | GCCCTAGACGATGCTCTCAA   | TGTTTGGTTTCTTGCGGTGT    | 59 | 161 |
| GmelCSP15 | TGTCTTTGGCTACGACGAAA   | CTTTGGATCGGGCTGCATTT    | 59 | 192 |
| GmelCSP16 | TTTGTGTTGTCTGGTGGCAA   | ACGGTTTCTACAGCTTCAGGT   | 59 | 192 |
| GmelCSP17 | GGAGCGATGATGAATTTACCGA | GCGGTGCCAATGTTCTCAAT    | 59 | 166 |
| GmelCSP18 | GTGCACTCCAGACGGTAAAG   | TGCTTTCAGGATCGTATCTACCT | 59 | 173 |
| GmelCSP19 | TCCTGCTCTACTTGTGTGCA   | CTGGATTACAACGCCACAG     | 59 | 222 |
| GmelCSP20 | GCTCACGGCGGCATATATTA   | TCCACCCAGTAAGCGTTTTC    | 59 | 186 |

---

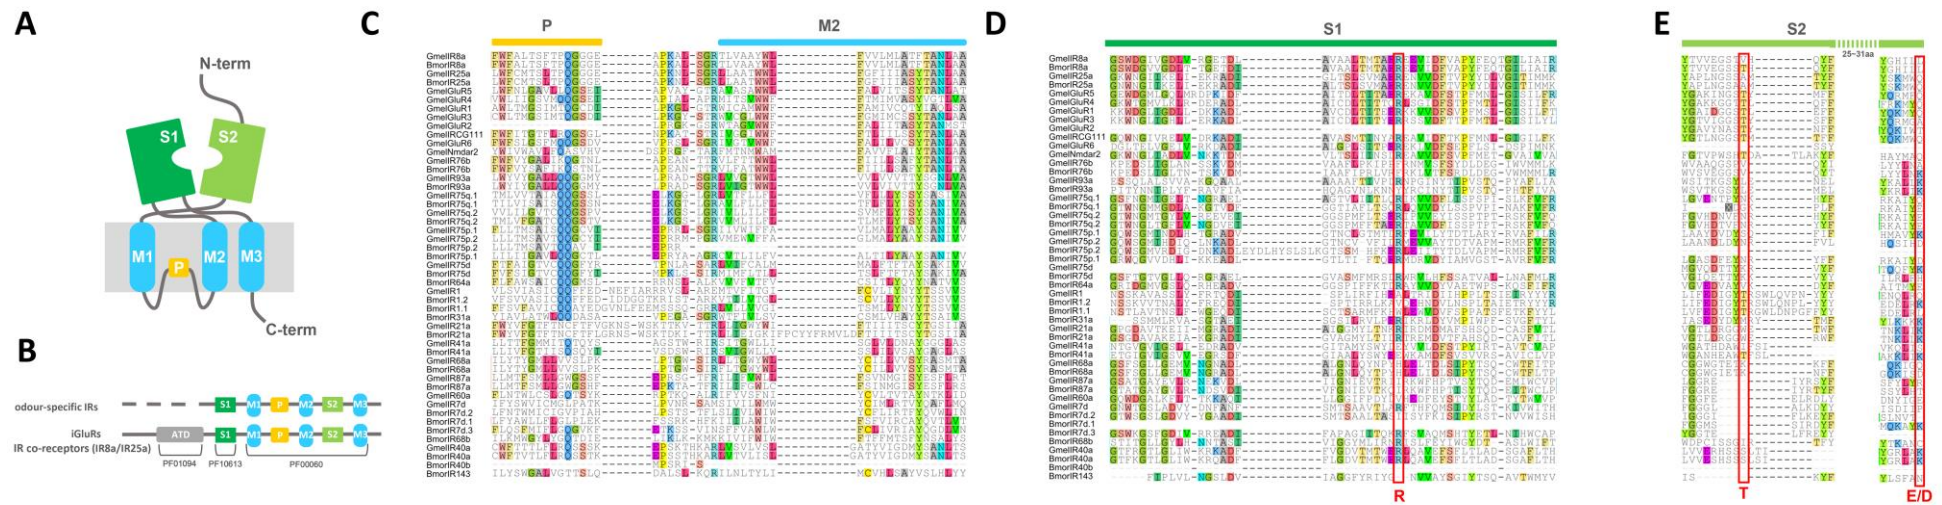

**Figure S1.** Excerpts from the amino acids alignment showing the predicted iGluRs/IRs binding domains. Predicted protein domain organization of IRs and iGluRs/IR co-receptors illustrated in diagram (A) and linear (B) form with associated Pfam predicted domains. (C) MAFFT amino acid alignment of the ion channel pore (P) and second transmembrane (M2) domains of *G. mellonella* IRs and *Bombyx mori* IRs and iGluRs. MAFFT amino acid alignments of the S1 (A) and part of S2 (B) ligand binding domains of candidate *G. mellonella* IRs and *B. mori* IRs and iGluRs. The key binding residues in iGluRs are in red boxes





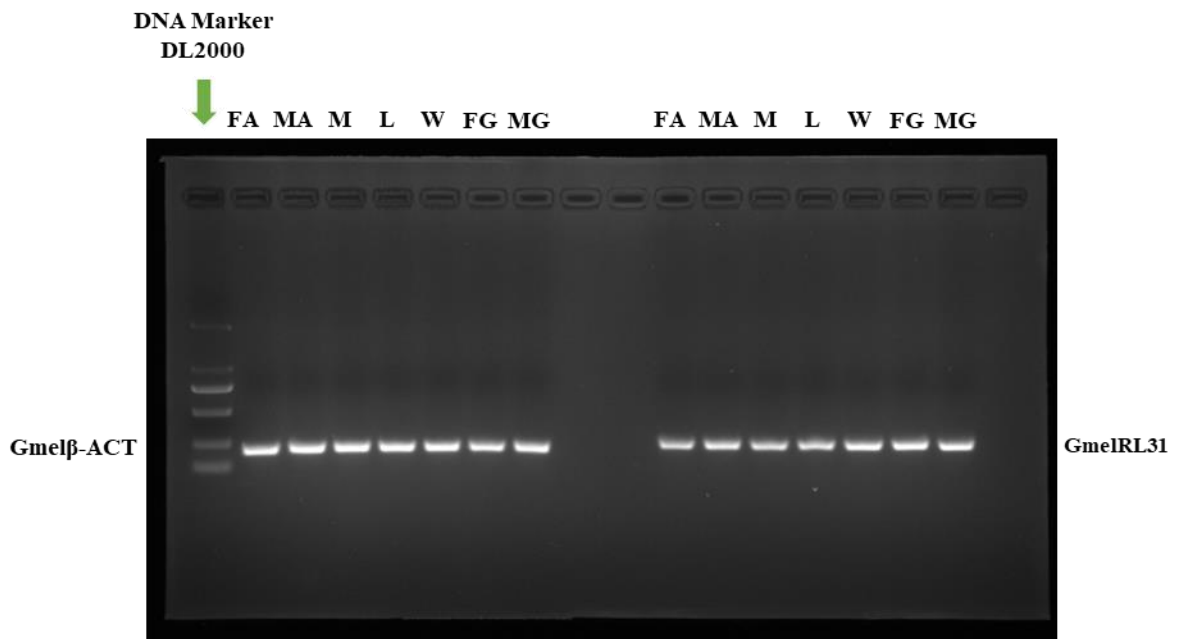

Figure S3. The full-length gel of Gmel $\beta$ -ACT and GmelRL31

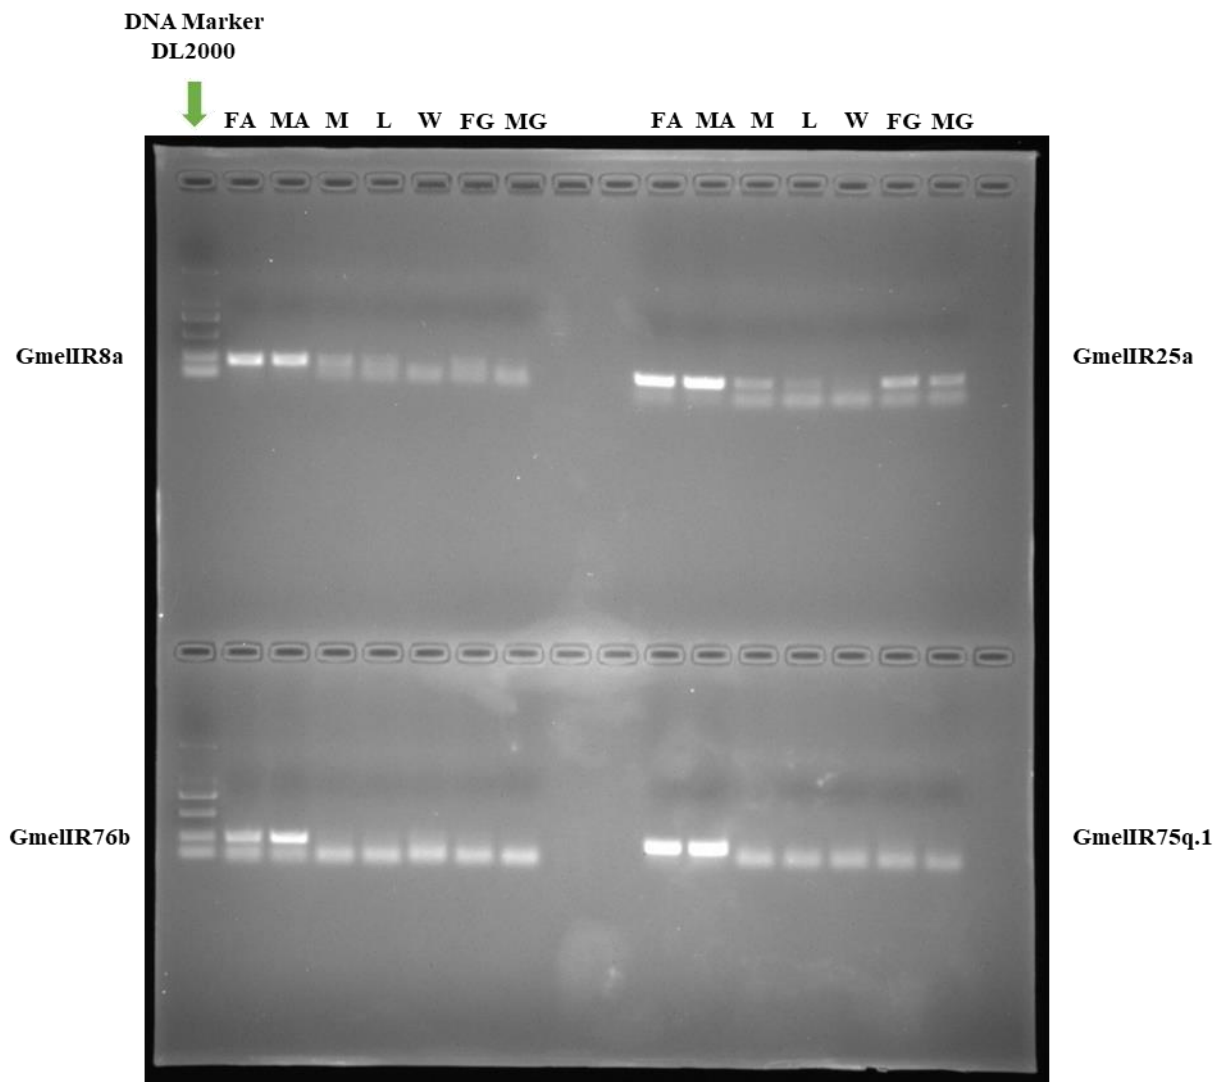

**Figure S4. The full-length gel of GmelIR8a, GmelIR25a, GmelIR76b and GmelIR75q.1**

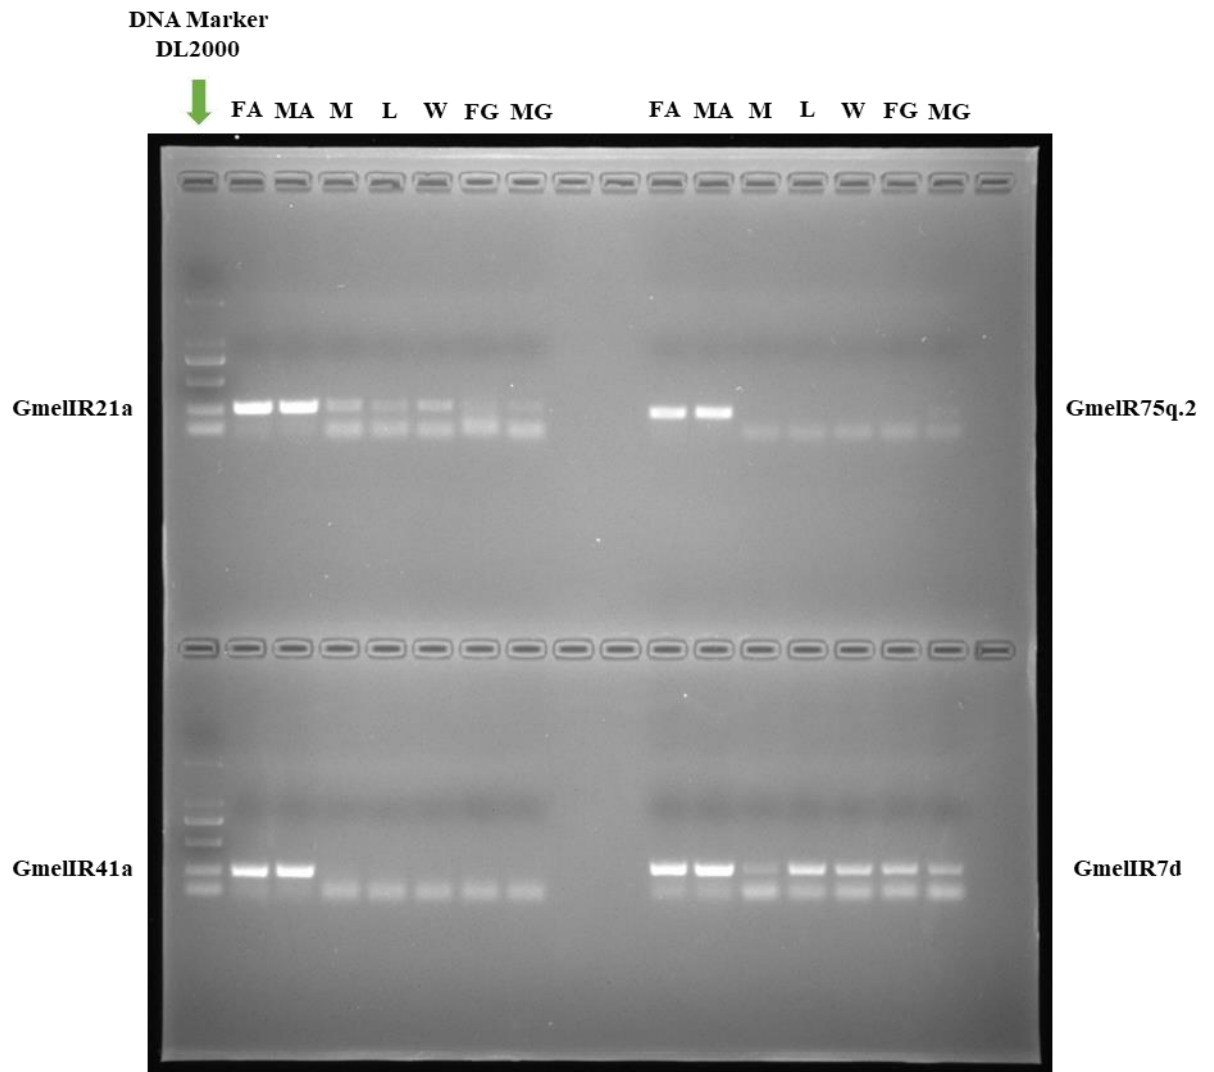

**Figure S5. The full-length gel of GmelIR21a, GmelIR75q.2, GmelIR41a and GmelIR7d**

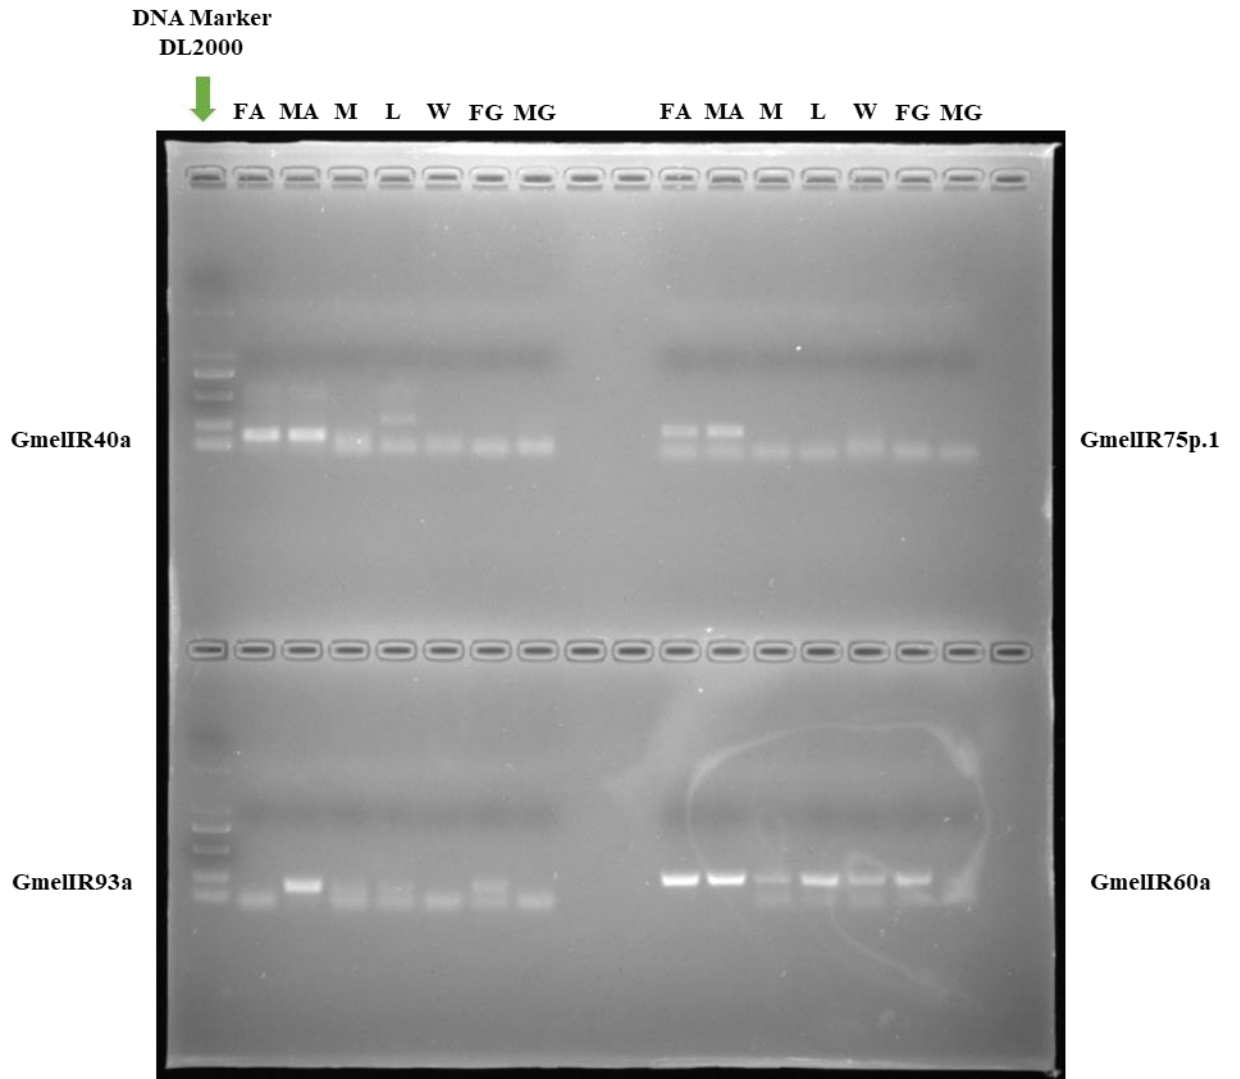

**Figure S6. The full-length gel of GmelIR40a, GmelIR75p.1, GmelIR93a and GmelIR60a**

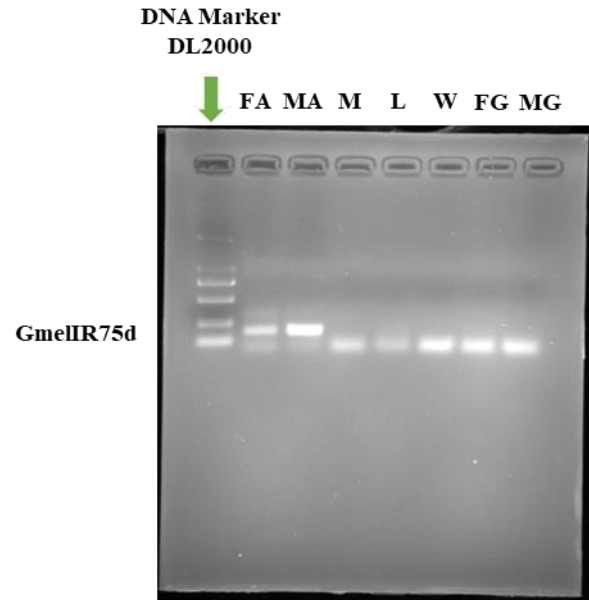

**Figure S7.** The full-length gel of GmelIR75d

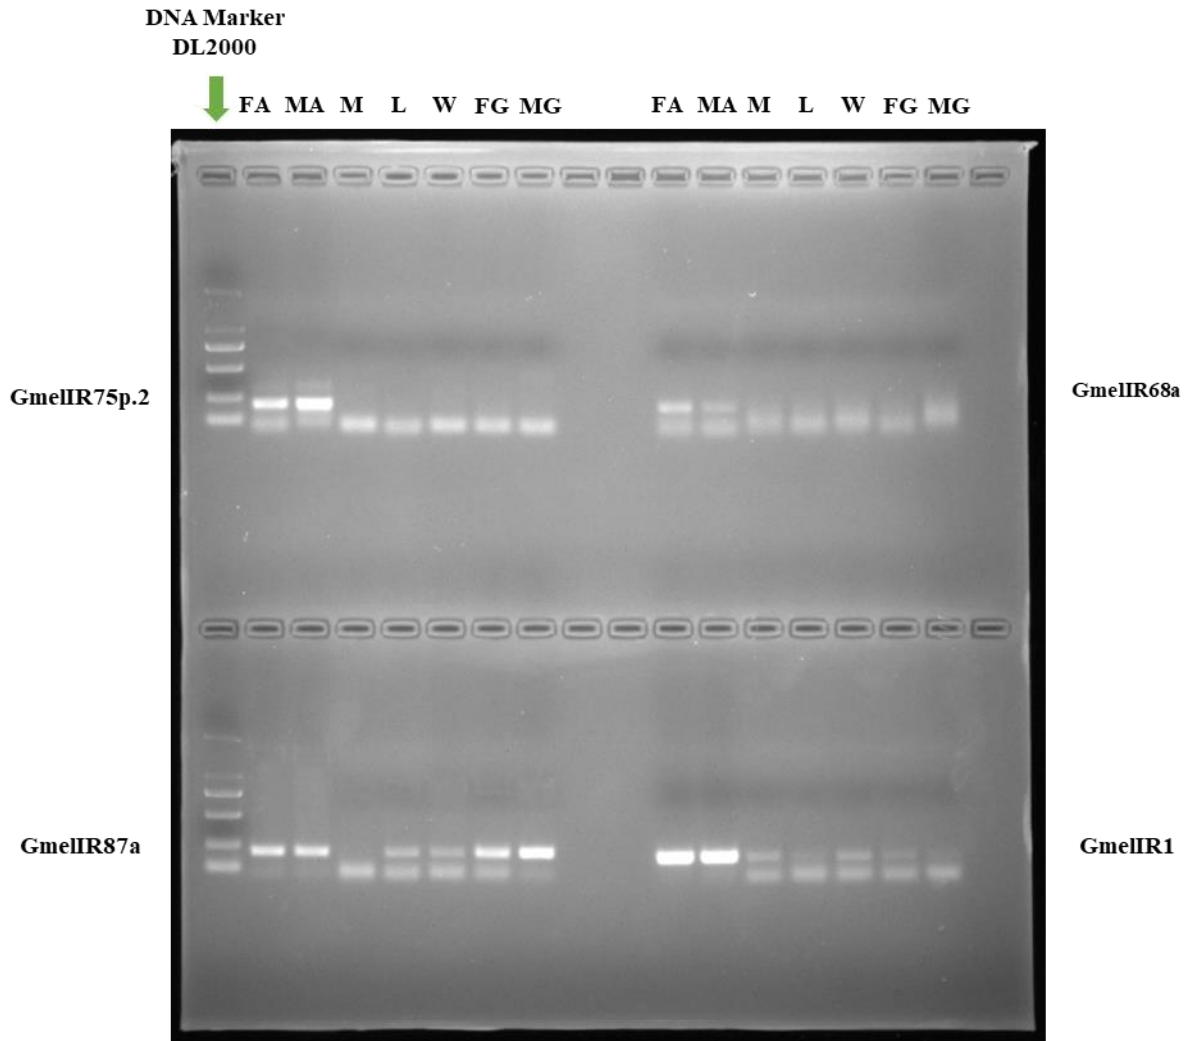

**Figure S8. The full-length gel of GmelIR75p.2, GmelIR68a, GmelIR87a and GmelIR1**

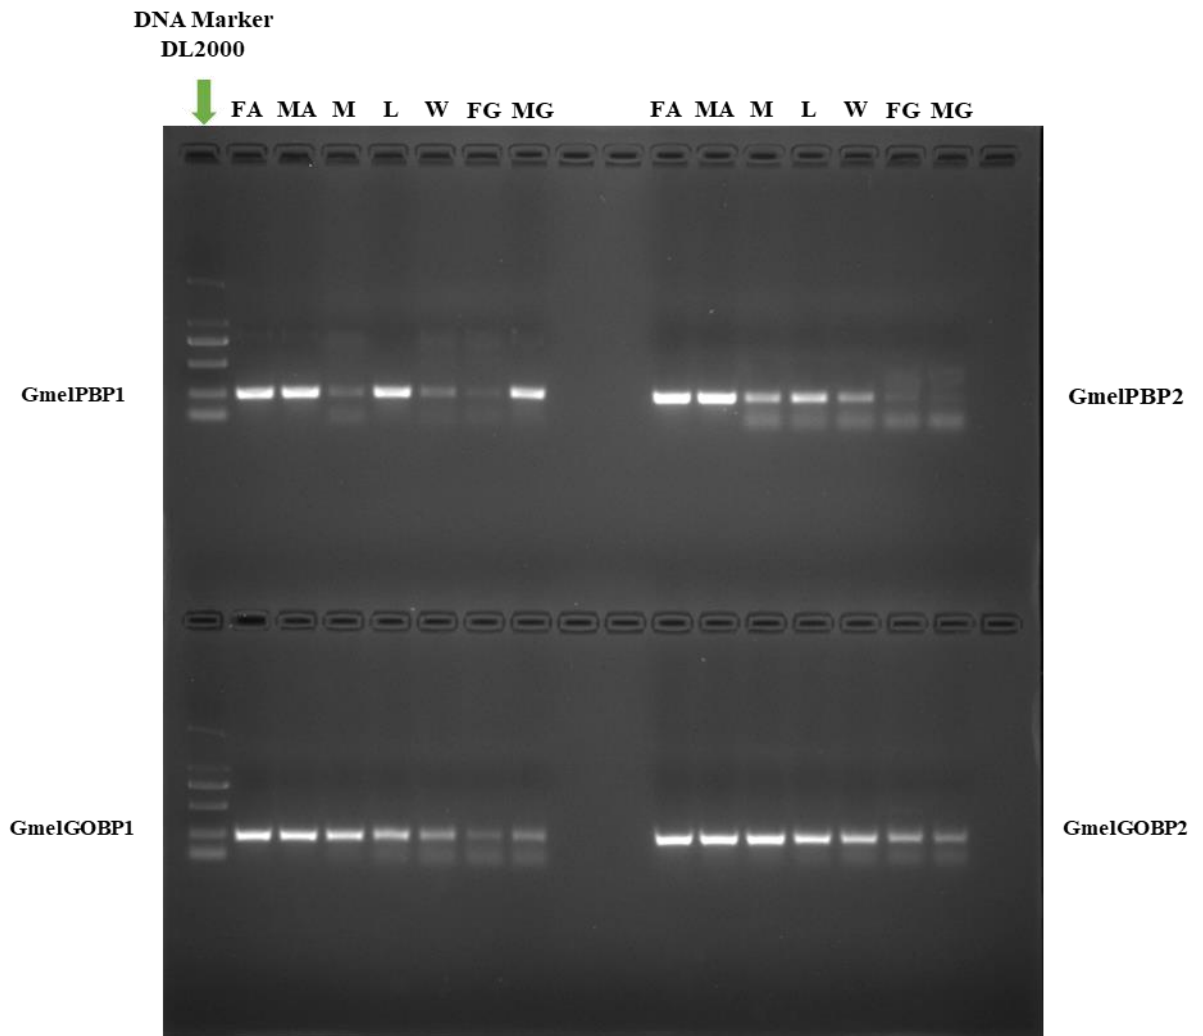

**Figure S9. The full-length gel of GmelPBP1, GmelPBP2, GmelGOBP1 and GmelGOBP2**

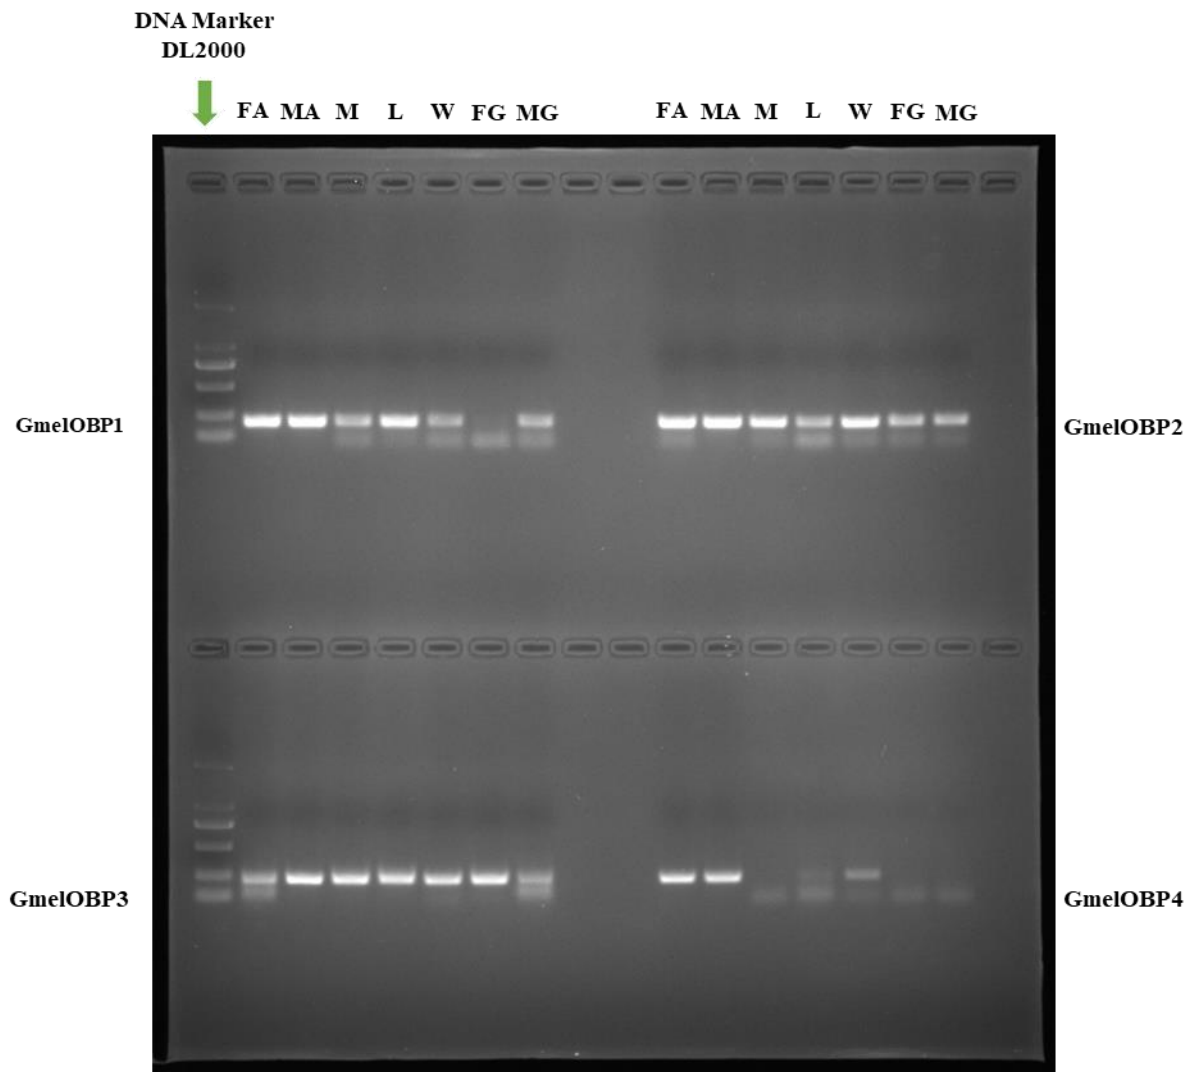

**Figure S10. The full-length gel of GmelOBP1-4**



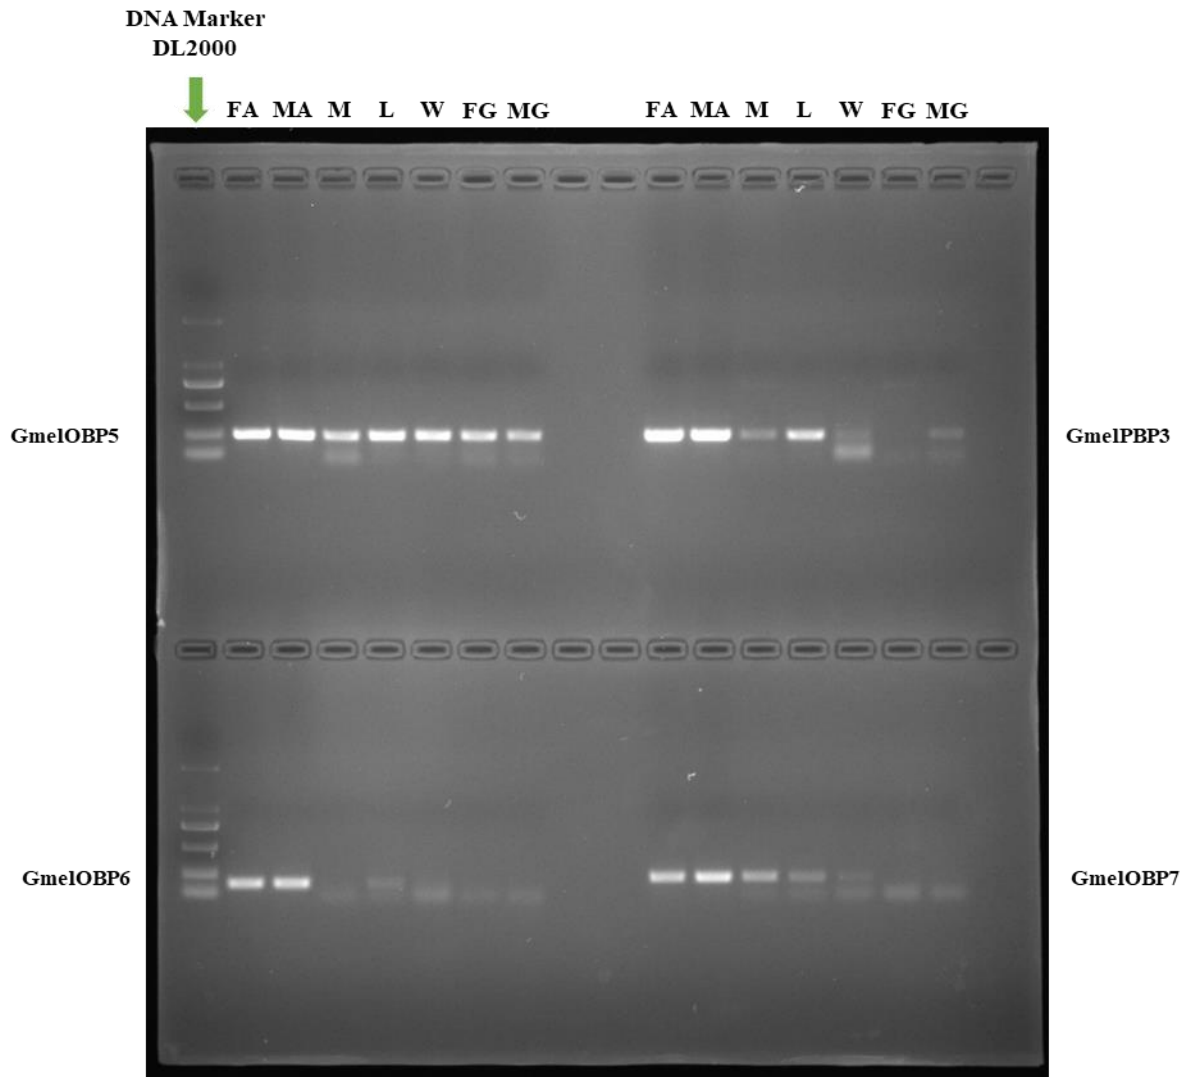

**Figure S11. The full-length gel of GmelOBP5, GmelIPBP3, GmelOBP6 and GmelOBP7**

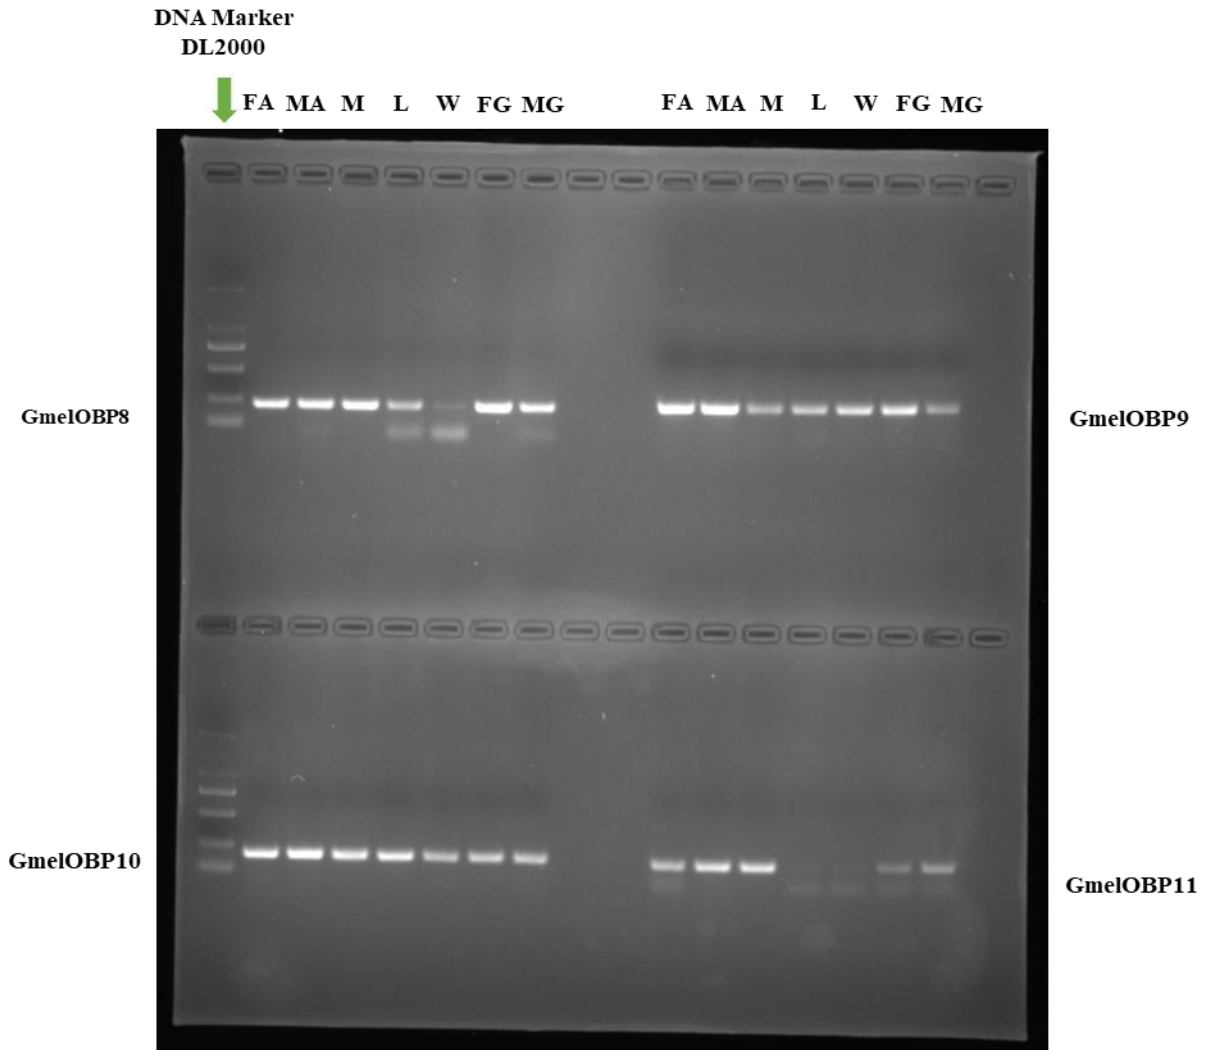

Figure S12. The full-length gel of GmelOBP8-11

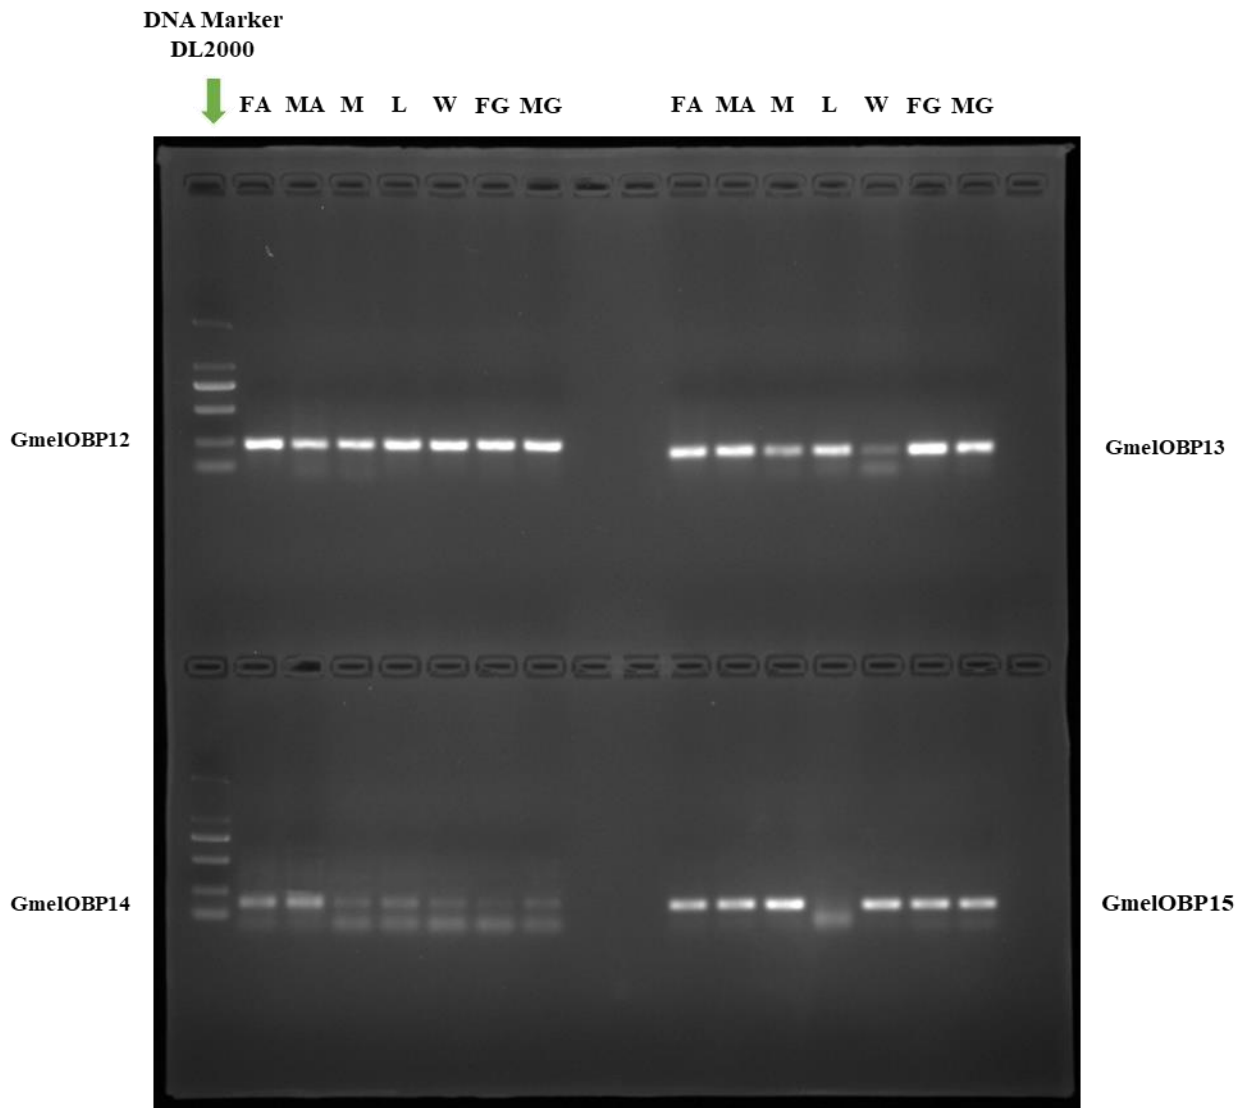

Figure S13. The full-length gel of GmelOBP12-15

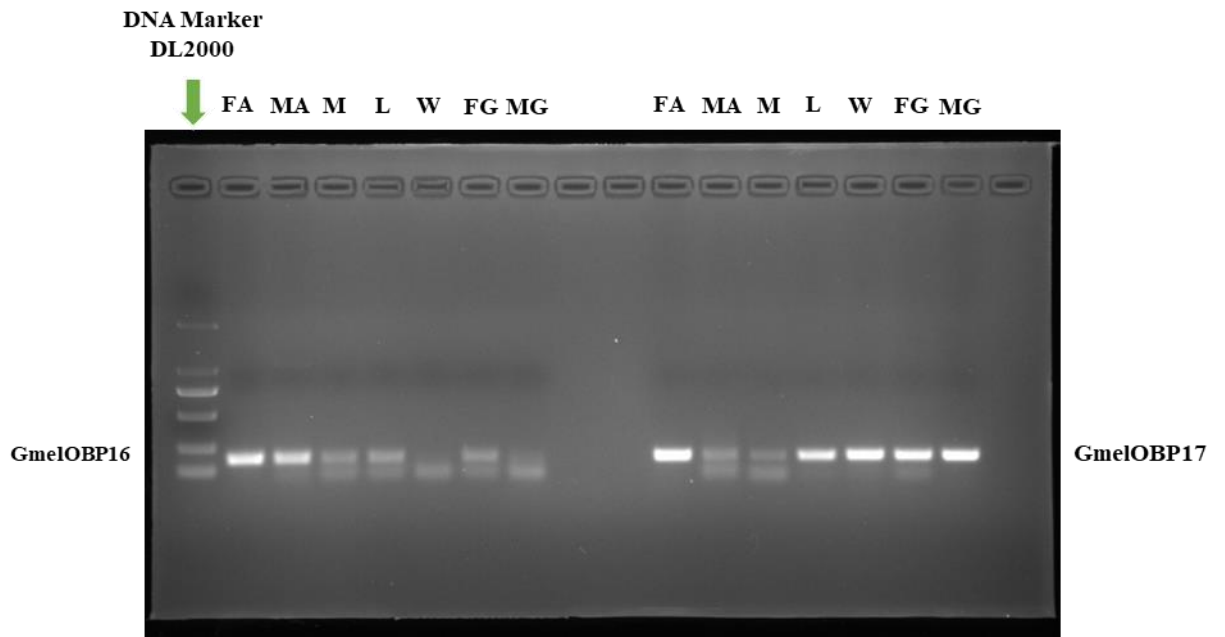

**Figure S14. The full-length gel of GmelOBP16-17**

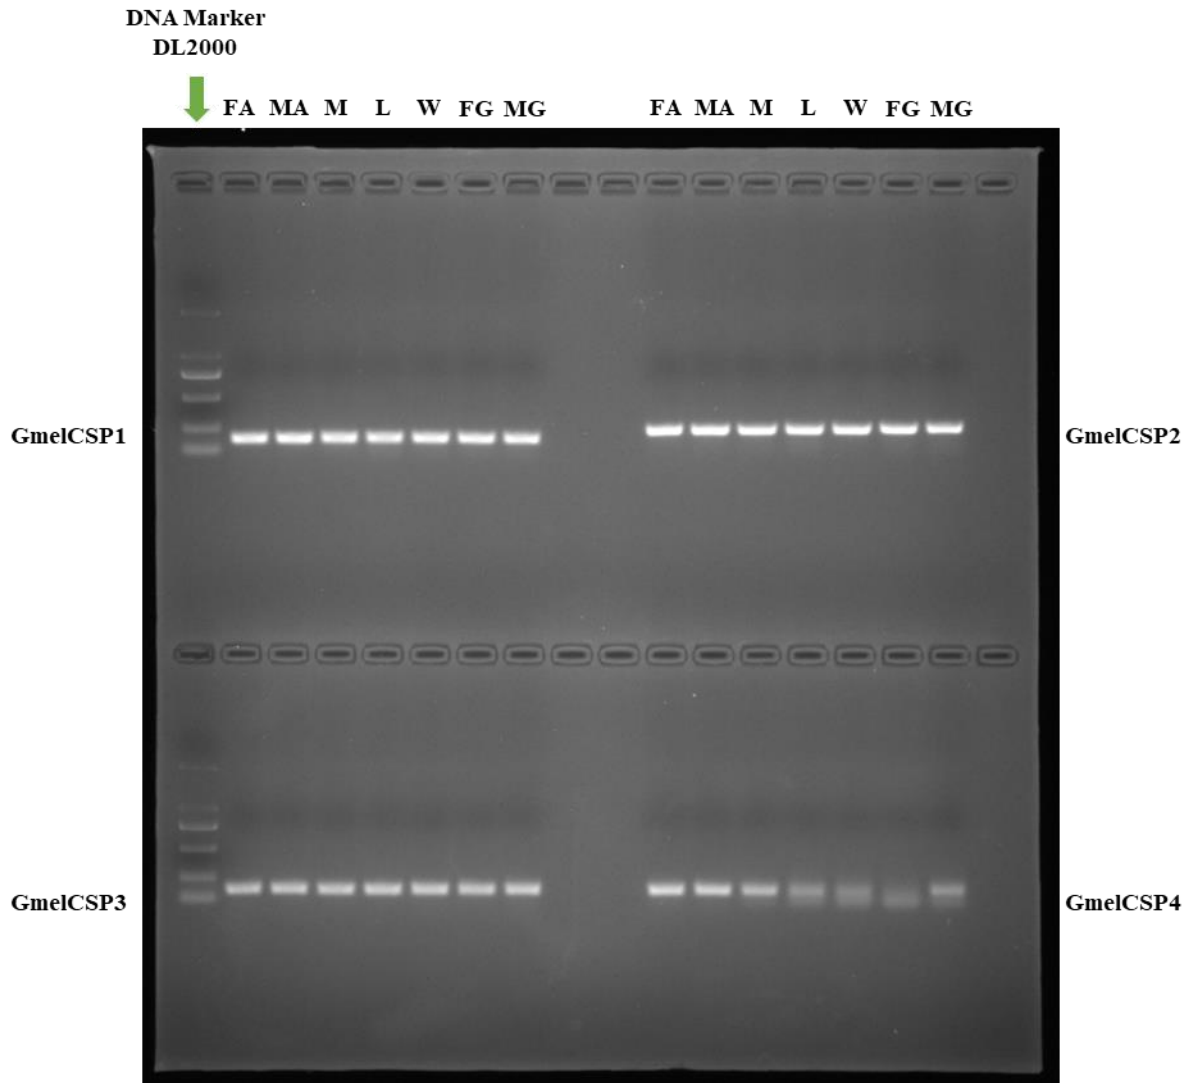

Figure S15. The full-length gel of GmelCSP1-4

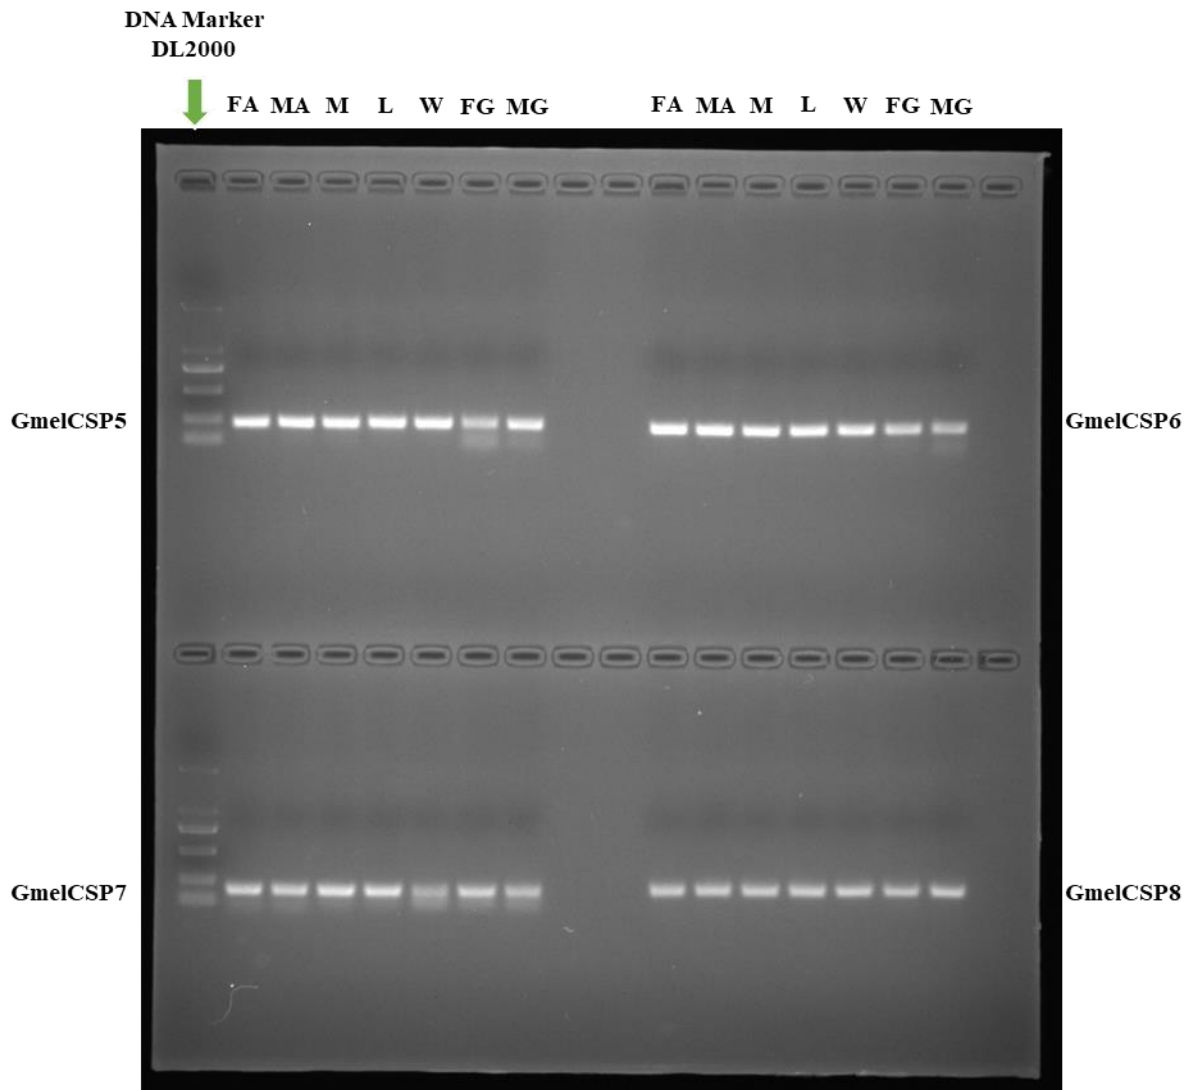

Figure S16. The full-length gel of GmelCSP5-8

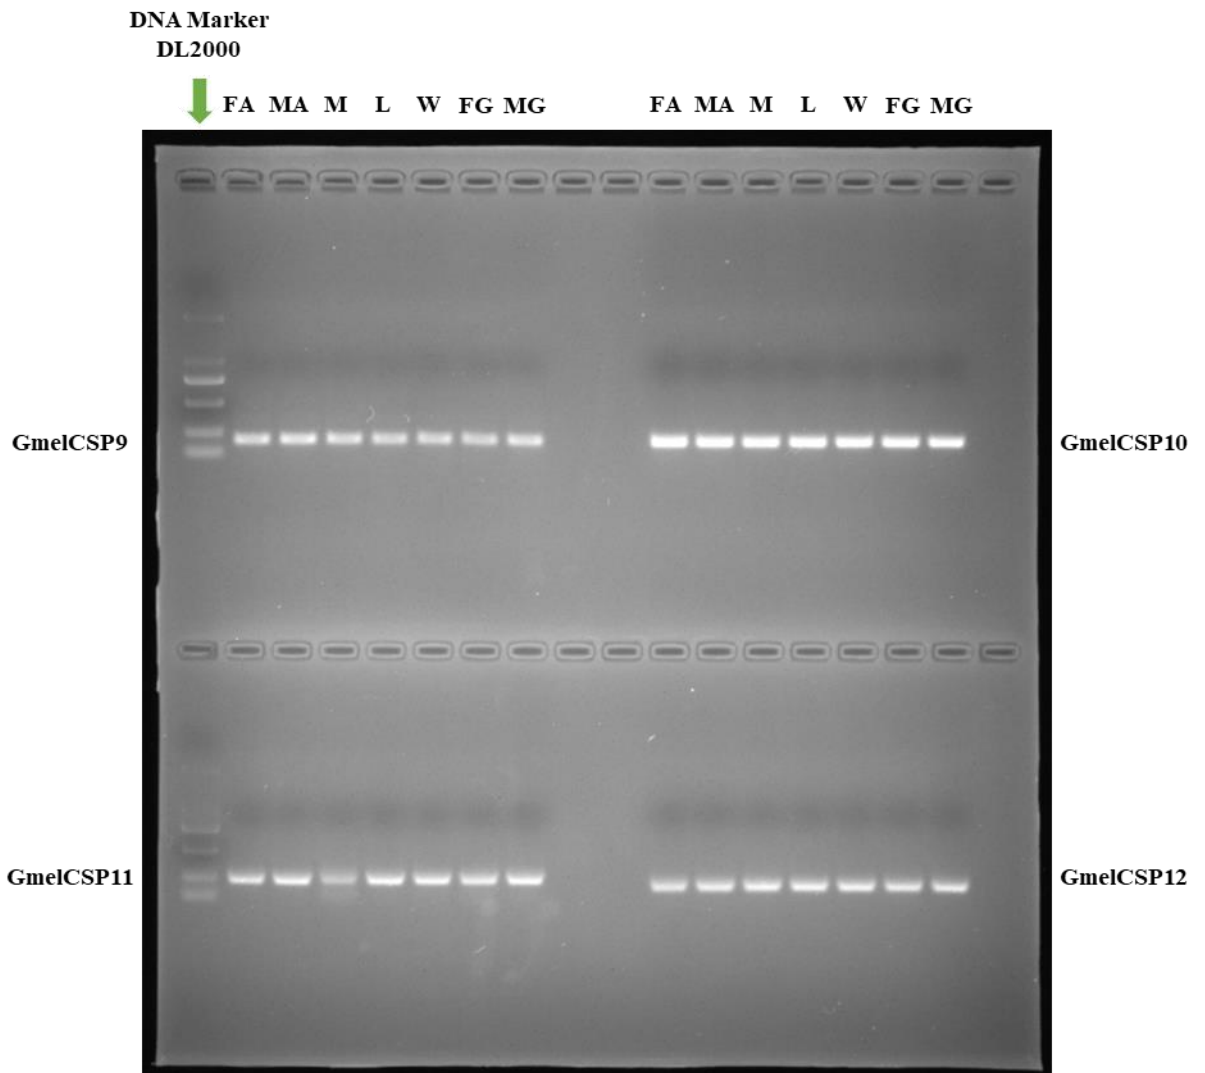

Figure S17. The full-length gel of GmelCSP9-12

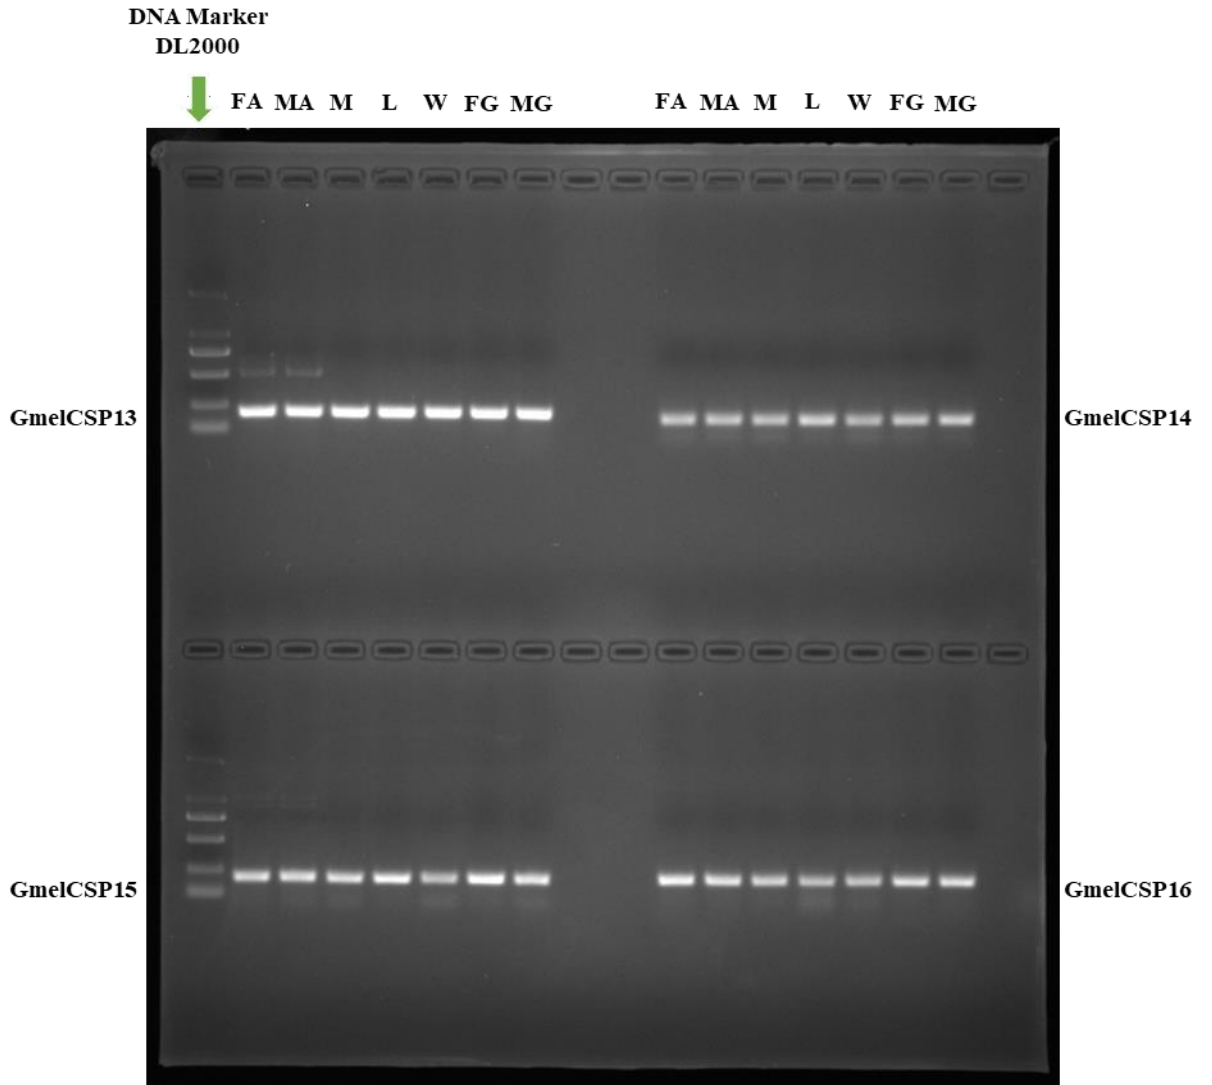

Figure S18. The full-length gel of GmelCSP13-16



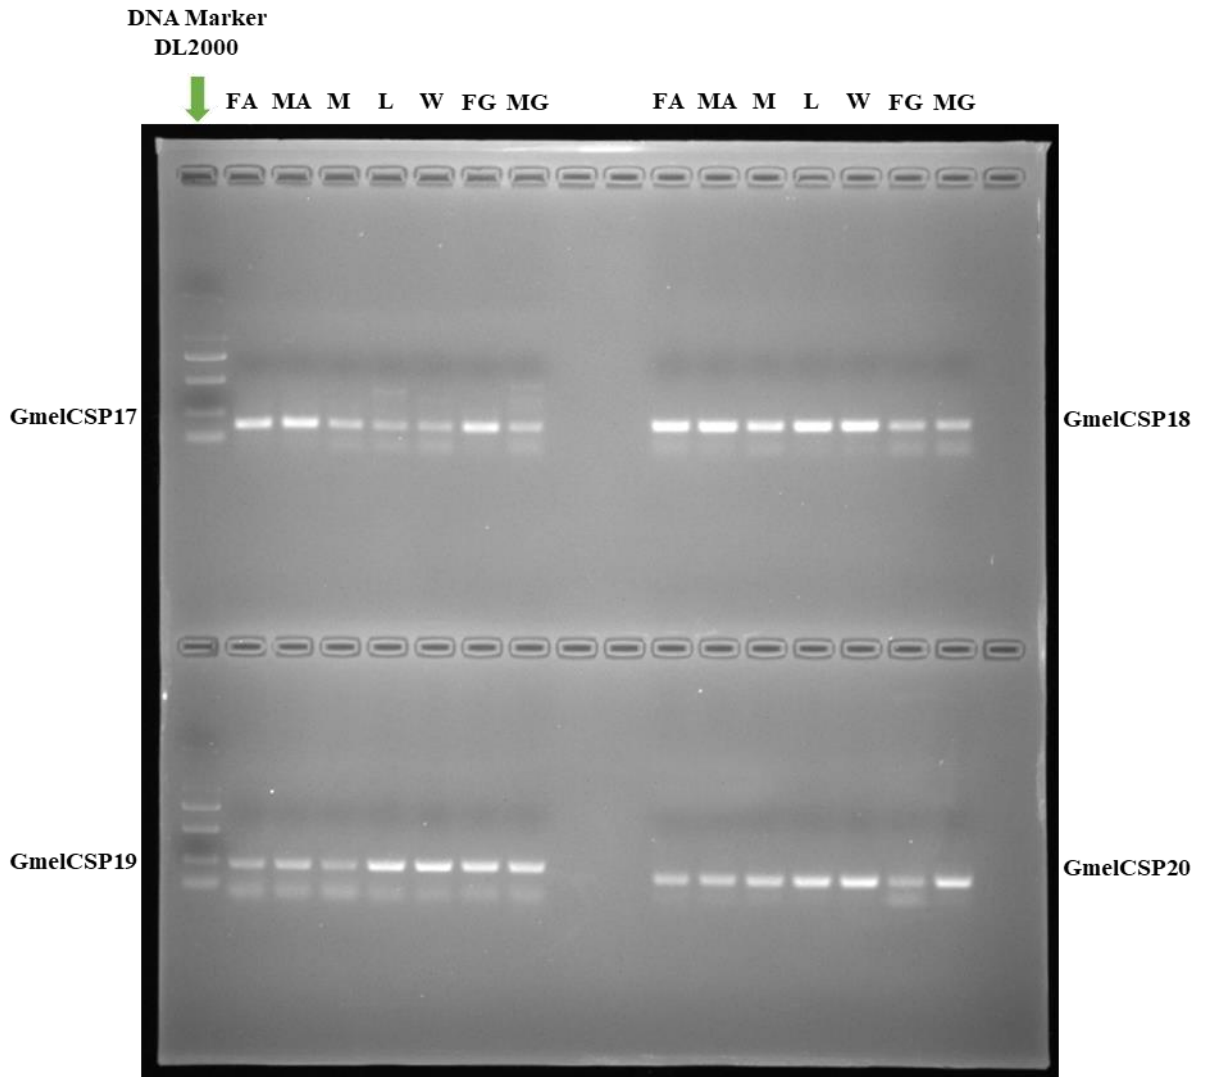

Figure S19. The full-length gel of GmelCSP17-20
